# Supplementary material for: Long-chain anionic surfactants enabling stable perovskite/silicon tandems with greatly suppressed stress corrosion
Source: PubMed Central journal article supplement (PMC10105702; doi:10.1038/s41467-023-37877-z), 2023-04-15
Supplement: 41467_2023_37877_MOESM3_ESM.pdf [file 41467_2023_37877_MOESM3_ESM.pdf]

## Solar Cells Reporting Summary

Nature Research wishes to improve the reproducibility of the work that we publish. This form is intended for publication with all accepted papers reporting the characterization of photovoltaic devices and provides structure for consistency and transparency in reporting. Some list items might not apply to an individual manuscript, but all fields must be completed for clarity.

For further information on Nature Research policies, including our [data availability policy](#), see [Authors & Referees](#).

### ► Experimental design

#### Please check: are the following details reported in the manuscript?

##### 1. Dimensions

- Area of the tested solar cells  Yes  No The active areas are 0.124 cm<sup>2</sup> and 0.949 cm<sup>2</sup> for small-size perovskite devices and tandem devices, respectively (Methods and Supplementary Fig. 53).
- Method used to determine the device area  Yes  No The device area was defined by an aperture mask (Methods).

##### 2. Current-voltage characterization

- Current density-voltage (J-V) plots in both forward and backward direction  Yes  No The J-V plots for the hysteresis study were obtained from scans in both forward and backward directions unless specified otherwise. The information can be found in the Methods and the plots are showed in Fig. 4b and Supplementary Fig. 49.
- Voltage scan conditions  Yes  No All devices were measured with a scan rate of 100 mV/s with the delay time of 10 ms (Methods).  
*For instance: scan direction, speed, dwell times*
- Test environment  Yes  No Our devices were characterized at room temperature (ca. 25 Celsius degree) in air.  
*For instance: characterization temperature, in air or in glove box*
- Protocol for preconditioning of the device before its characterization  Yes  No No preconditioning protocol was used before the characterization. The information is stated in "Device characterization" part in "Methods".
- Stability of the J-V characteristic  Yes  No Stabilized photocurrent output by holding the voltage at the maximum power point (Supplementary Figs. 30 and 51). The stability test information can be found in the "Stability testing" part in "Methods".  
*Verified with time evolution of the maximum power point or with the photocurrent at maximum power point; see ref. 7 for details.*

##### 3. Hysteresis or any other unusual behaviour

- Description of the unusual behaviour observed during the characterization  Yes  No No J-V hysteresis or any other unusual behaviour was observed and the related comments were mentioned in manuscript.
- Related experimental data  Yes  No We show the J-V plots under different directions in Fig. 4b and Supplementary Fig. 49.

##### 4. Efficiency

- External quantum efficiency (EQE) or incident photons to current efficiency (IPCE)  Yes  No The EQE spectrum can be found in Supplementary Figs. 31 and 50.
- A comparison between the integrated response under the standard reference spectrum and the response measure under the simulator  Yes  No The integrated J<sub>sc</sub> from EQE spectrum is agreed well (less than 5% mismatch) with J-V measurement. The comparison is represented in Fig. 4b and Supplementary Figs. 31.
- For tandem solar cells, the bias illumination and bias voltage used for each subcell  Yes  No "Device characterization" part in "Methods".

##### 5. Calibration

- Light source and reference cell or sensor used for the characterization  Yes  No A solar simulator (EMS-35AAA, Ushio Spax Inc.) based on the Ushio Xe short arc lamp 500 was used to simulate sunlight irradiation of 1 sun (AM1.5G; 100 mW·cm<sup>-2</sup>). The solar simulator illumination intensity was calibrated using a KG5 reference Si-cell (Enlitech). The information can be found in the "Device characterization" part in "Methods".

|                                                                                                                                                                                               |                                                                        |                                                                                                                                                                                                                                                                                                                                                                                                 |
|-----------------------------------------------------------------------------------------------------------------------------------------------------------------------------------------------|------------------------------------------------------------------------|-------------------------------------------------------------------------------------------------------------------------------------------------------------------------------------------------------------------------------------------------------------------------------------------------------------------------------------------------------------------------------------------------|
| Confirmation that the reference cell was calibrated and certified                                                                                                                             | <input checked="" type="checkbox"/> Yes<br><input type="checkbox"/> No | The information can be found in the "Device characterization" part in "Methods".                                                                                                                                                                                                                                                                                                                |
| Calculation of spectral mismatch between the reference cell and the devices under test                                                                                                        | <input checked="" type="checkbox"/> Yes<br><input type="checkbox"/> No | Spectral mismatch factor of 1 was used for all J-V measurements.                                                                                                                                                                                                                                                                                                                                |
| <b>6. Mask/aperture</b>                                                                                                                                                                       |                                                                        |                                                                                                                                                                                                                                                                                                                                                                                                 |
| Size of the mask/aperture used during testing                                                                                                                                                 | <input checked="" type="checkbox"/> Yes<br><input type="checkbox"/> No | The area of aperture mask is 0.124 cm <sup>2</sup> (Methods).                                                                                                                                                                                                                                                                                                                                   |
| Variation of the measured short-circuit current density with the mask/aperture area                                                                                                           | <input checked="" type="checkbox"/> Yes<br><input type="checkbox"/> No | The aperture area is fixed for each device.                                                                                                                                                                                                                                                                                                                                                     |
| <b>7. Performance certification</b>                                                                                                                                                           |                                                                        |                                                                                                                                                                                                                                                                                                                                                                                                 |
| Identity of the independent certification laboratory that confirmed the photovoltaic performance                                                                                              | <input checked="" type="checkbox"/> Yes<br><input type="checkbox"/> No | We sent our device to Shanghai Institute of Microsystem and Information Technology (SIMIT) for J-V characterization according to their standard protocol (IEC60904-1 2006). The information can be found in Supplementary Fig. 53.                                                                                                                                                              |
| A copy of any certificate(s)<br><i>Provide in Supplementary Information</i>                                                                                                                   | <input checked="" type="checkbox"/> Yes<br><input type="checkbox"/> No | SIMIT provided J-V results according to their standard protocol (IEC60904-1 2006). The information can be found in Supplementary Fig. 53.                                                                                                                                                                                                                                                       |
| <b>8. Statistics</b>                                                                                                                                                                          |                                                                        |                                                                                                                                                                                                                                                                                                                                                                                                 |
| Number of solar cells tested                                                                                                                                                                  | <input checked="" type="checkbox"/> Yes<br><input type="checkbox"/> No | 12 devices are provided for statistical analysis of the photovoltaic parameters (Supplementary Figs. 32, 33 and 52) and 6 devices are provided for ISOS-L2 aging test (Fig 4e,g and Supplementary Figs. 44 and 54).                                                                                                                                                                             |
| Statistical analysis of the device performance                                                                                                                                                | <input checked="" type="checkbox"/> Yes<br><input type="checkbox"/> No | Supplementary Figs. 32, 33 and 52.                                                                                                                                                                                                                                                                                                                                                              |
| <b>9. Long-term stability analysis</b>                                                                                                                                                        |                                                                        |                                                                                                                                                                                                                                                                                                                                                                                                 |
| Type of analysis, bias conditions and environmental conditions<br><i>For instance: illumination type, temperature, atmosphere humidity, encapsulation method, preconditioning temperature</i> | <input checked="" type="checkbox"/> Yes<br><input type="checkbox"/> No | The unencapsulated devices were aged using a xenon lamp with 100 mW·cm <sup>-2</sup> irradiance at the regular air ambient environment (RH = 40-70%, T = 20-35 °C) without preconditioning. The information on the variety of aging conditions used for testing long-term stability is present throughout the manuscript and in the "Methods" section under the "Stability Testing" subsection. |
